# Supplementary material
Source: ML conference proceedings conference paper supplement (https://openaccess.thecvf.com/content/CVPR2024/html/Ma_Generalizing_6-DoF_Grasp_CVPR_2024_paper.html)
Supplement: Supplementary file 2 [file Ma_Generalizing_6-DoF_Grasp_CVPR_2024_supplemental.zip]

Archive with 2 entries (2 files):
- supp.pdf
- supp_video.mp4
